# Pathology of severe coronary artery calcification treated with orbital atherectomy followed by balloon modification

Shigetaka Kageyama <sup>1\*</sup>†, Sho Torii <sup>2†</sup>, Tomoya Onodera <sup>1</sup>, and Gaku Nakazawa <sup>3</sup>

<sup>1</sup>Department of Cardiology, Shizuoka City Shizuoka Hospital, 10-93, Ohtemachi, Aoi-ku, Shizuoka 420-8630, Japan; ; <sup>2</sup>Department of Cardiology, Tokai University School of Medicine, 143 Shimokasuya, Isehara-shi, Kanagawa 259-1193, Japan; and <sup>3</sup>Department of Cardiology, Kindai University School of Medicine, 3-4-1 Kowakae, Higashiosaka city, Osaka 577-8502, Japan

Received 21 March 2021; first decision 20 April 2021; accepted 18 May 2021

A 66-year-old-man with interstitial pneumonia and diabetes presented with effort angina. Coronary angiography findings showed severe stenosis of the left anterior descending artery (LAD).

Percutaneous coronary intervention was performed, and intravascular ultrasound (IVUS) imaging findings demonstrated a >270° calcification at the narrowest lesion. Three runs of low-speed retrograde orbital atherectomy (OA) were performed in the middle portion of the LAD with circumferential calcification. We used a 2.5-mm cutting

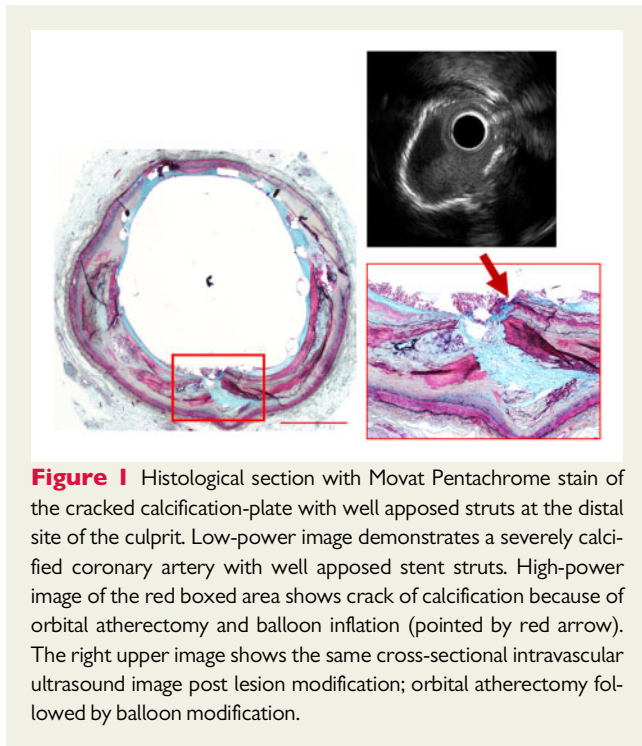

**Figure 1** Histological section with Movat Pentachrome stain of the cracked calcification-plate with well apposed struts at the distal site of the culprit. Low-power image demonstrates a severely calcified coronary artery with well apposed stent struts. High-power image of the red boxed area shows crack of calcification because of orbital atherectomy and balloon inflation (pointed by red arrow). The right upper image shows the same cross-sectional intravascular ultrasound image post lesion modification; orbital atherectomy followed by balloon modification.

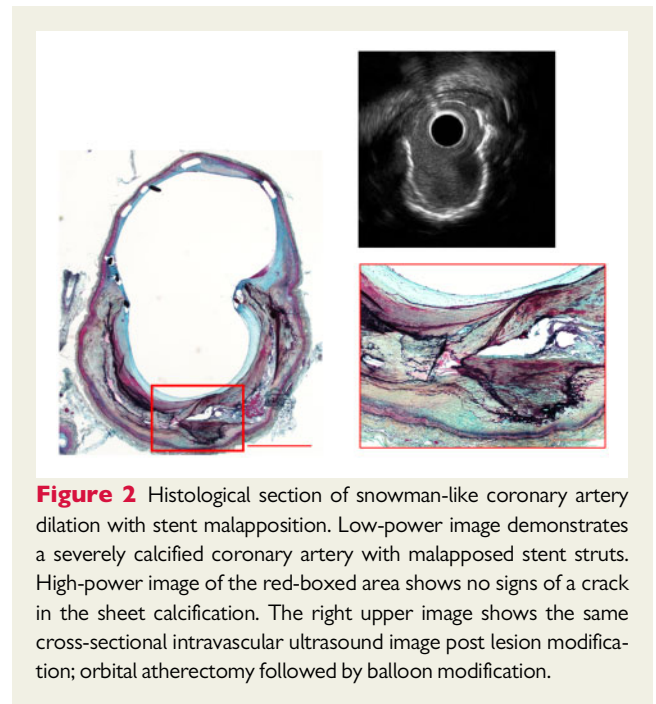

**Figure 2** Histological section of snowman-like coronary artery dilation with stent malapposition. Low-power image demonstrates a severely calcified coronary artery with malapposed stent struts. High-power image of the red-boxed area shows no signs of a crack in the sheet calcification. The right upper image shows the same cross-sectional intravascular ultrasound image post lesion modification; orbital atherectomy followed by balloon modification.

\* Corresponding author. Tel: +81 54 253 3125, Email: [shigenewf@yahoo.co.jp](mailto:shigenewf@yahoo.co.jp)

†The first two authors contributed equally to this work.

Handling Editor: Mohamed Farag

Peer-reviewers: Ying Xuan Gue; Andreas Mitsis and Yehia Saleh

© The Author(s) 2021. Published by Oxford University Press on behalf of the European Society of Cardiology.

This is an Open Access article distributed under the terms of the Creative Commons Attribution Non-Commercial License (<http://creativecommons.org/licenses/by-nc/4.0/>), which permits non-commercial re-use, distribution, and reproduction in any medium, provided the original work is properly cited. For commercial re-use, please contact [journals.permissions@oup.com](mailto:journals.permissions@oup.com)

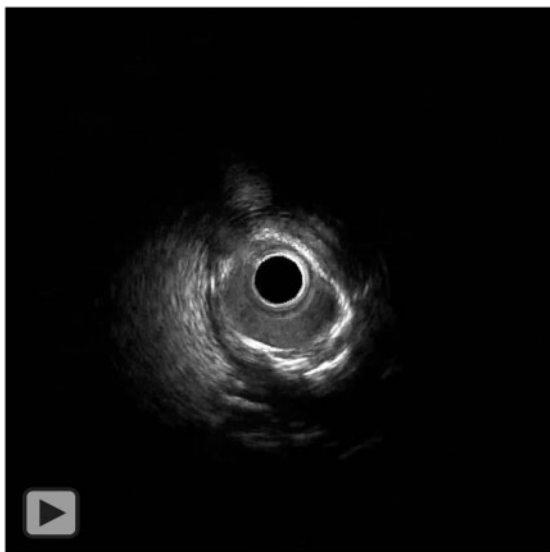

**Video 1** Intravascular ultrasound before intervention.

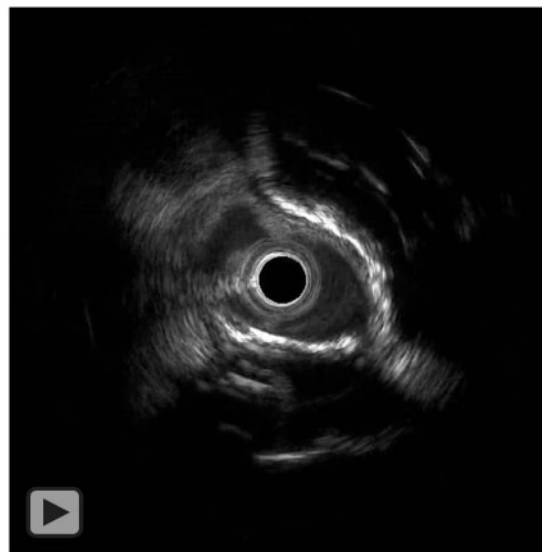

**Video 3** Intravascular ultrasound after stent implantation.

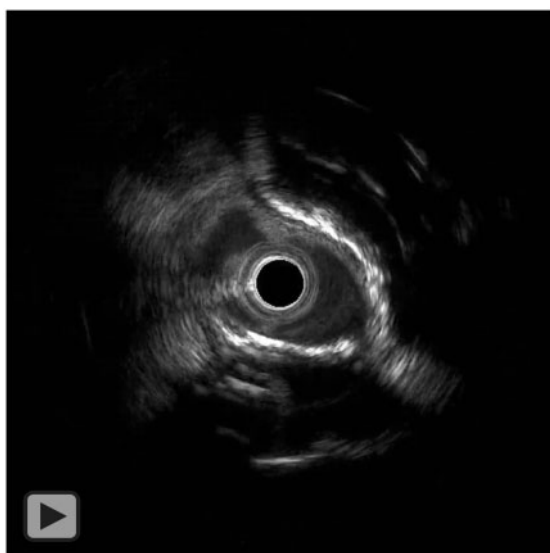

**Video 2** Intravascular ultrasound after orbital atherectomy and cutting balloon inflation.

balloon, followed by a 3-mm scoring balloon to dilate the lesion; both balloons were inflated at rated burst pressure; subsequently, a 3.5-mm newer-generation sirolimus-eluting stent was implanted. The final IVUS imaging examination performed after stent implantation showed snowman-like dilation with stent malapposition in the middle portion of the lesion. After 4 months, the patient died of pulmonary hypertension.

Pathological sections of the stented lesion showed an underlining sheet of calcium that was >1 mm thick with a circumferential distribution of >270°. The calcified lesion, in which OA was performed, was fragmented without ablation signs on its surface. The fragmented part

was completely separated into two pieces, resulting in good apposition (Figure 1). At the remaining malapposed strut in the snowman-like dilated site, a 270° sheet calcification showed recoil without the calcium cracking (Figure 2). To the best of our knowledge, this is the first case report showing co-registered images of IVUS and histological sections, which demonstrate how OA works in severely calcified lesions. The histopathological examinations revealed calcification that was >1 mm thick circumferentially, suggesting that plain old balloon angioplasty alone and cutting balloons, cannot crack such lesions, as shown in a previous optical coherence tomography study.<sup>1</sup> In this case, the crown rotated and 'knocked' the plate-like calcification discontinuously, thereby breaking the thick calcification without a medial tear, which avoided restenosis.<sup>2</sup>

## Supplementary material

Supplementary material is available at *European Heart Journal - Case Reports* online.

**Ethical approval:** The study was conducted in accordance with the Helsinki Declaration.

**Consent:** The authors confirm that written consent for submission and publication of this case report including images and associated text has been obtained from the patient in line with COPE guidance.

**Conflict of interest:** S.T. receives research grants from Abbot Vascular Japan, Boston Scientific Japan, Medtronic, and receives honoraria from Boston Scientific Japan. G.N. is a consultant for Boston Scientific, Abbott Vascular, Terumo Corp., Japan Medical Device Technology Co., Ltd, ZAIKEN, and receives research grants from Boston Scientific, Abbott Vascular, Terumo Corp., Japan Medical Device Technology Co., Ltd. Other authors have declared no conflict of interest.

**Funding:** None declared.

## References

1. Kubo T, Shimamura K, Ino Y, Yamaguchi T, Matsuo Y, Shiono Y et al. Superficial calcium fracture after PCI as assessed by OCT. *JACC Cardiovasc Imaging* 2015;**8**: 1228–1289.
2. Torii S, Jinnouchi H, Sakamoto A, Mori H, Park J, Ainoa FC et al. Vascular responses to coronary calcification following implantation of newer-generation drug-eluting stents in humans: impact on healing. *Eur Heart J* 2020;**41**: 786–796.
